# Supplementary material
Source: PubMed Central journal article supplement (PMC5866238)
Supplement: NIHMS945749-supplement-436_2018_5787_MOESM1_ESM.pdf [file NIHMS945749-supplement-436_2018_5787_MOESM1_ESM.pdf]

Query 1 MLTSQEVACQFIPAFFERLASNPAELAEMYGPSSSLTIVDFVYGTTEVRNEDVPRAVEQW 60  
 MLTSQEVACQFIPAFFERLASNPAELAEMYGP+SSLTIVDFVYGTTEVRNEDVPRAVEQW  
 Sbjct 1 MLTSQEVACQFIPAFFERLASNPAELAEMYGPNSSLTIVDFVYGTTEVRNEDVPRAVEQW 60

Query 61 AQILQGCELCVESYSYSAVPLYGGVSVYVVTMFAESKTTRHYFQFVNILEAYGAGAYGSEAYF 120  
 AQILQGCELCVESYSYSAVPLYGGVSVYVVTMFAESKTTRHYFQFVNILEAYGAGAYGSEAYF  
 Sbjct 61 AQILQGCELCVESYSYSAVPLYGGVSVYVVTMFAESKTTRHYFQFVNILEAYGAGAYGSEAYF 120

Query 121 TRHQILIRPGSAETEQPEPEVMPDQEPKLGVSPEAVESSALLTSRSAADEERKEQQQQKK 180  
 +RHQILIRPGSAETEQPEPEV+PDQEPKL+VSPEAVESSALLTSRSA+DEERKEQQQQKK  
 Sbjct 121 IRHQILIRPGSAETEQPEPEVTPDQEPKLEVSPEAVESSALLTSRSATDEERKEQQQQKK 180

Query 181 NTTTVVGLQAAAAAATPDKTAAVEPETAATVQRQPPVPSKPKTASLASAQPKEQRQP 240  
 NTT VVGLQAAAAA+PDKTAAVEPETAATVQRQPPVPSKPKTASLASAQPKEQRQP  
 Sbjct 181 NTT-VVGLQAAAAAATPDKTAAVEPETAATVQRQPPVPSKPKTASLASAQPKEQRQP 239

Query 241 LRVIIPEGGNADATEVHAPAKPTQTEQRHTSSSAGGAGATKPPAKFPRSPAVSIGDRLM 300  
 LRVIIPEG+NADATEVHAPAKPTQTEQRHTSSSAGGAGATKPPAKFPRSPAVSIGDRLM  
 Sbjct 240 LRVIIPEGVNADATEVHAPAKPTQTEQRHTSSSAGGAGATKPPAKFPRSPAVSIGDRLM 299

Query 301 FNV DYEVSDEETKTAFGPLAANIVSLRNNSANGHVFLDFSDKEKVM DIIKANPPTVGARK 360  
 FN+DYEVSDEE+K+AFGPLAANIVSLRNNSANGHVFLDFSDKEKVM DIIKANPPTVGARK  
 Sbjct 300 FNIDYEVSDEEIKAAFGLAANIVSLRNNSANGHVFLDFSDKEKVM DIIKANPPTVGARK 359

Query 361 TRVSIYRQRTRQQGENNENRTH 382  
 TRVSIYRQRTRQQGENNENRTH  
 Sbjct 360 TRVSIYRQRTRQQGENNENRTH 381
