# Supplementary material
Source: PubMed Central journal article supplement (PMC5866238)
Supplement: NIHMS945749-supplement-436_2018_5787_MOESM2_ESM.pdf [file NIHMS945749-supplement-436_2018_5787_MOESM2_ESM.pdf]

| <b>Cell line</b> | <b>Background</b> | <b>Genotype</b>                 | <b>Drug Selection</b> | <b>Experimental purpose</b>                                      |
|------------------|-------------------|---------------------------------|-----------------------|------------------------------------------------------------------|
| Wild-type        | Y strain          |                                 |                       | Parent strain                                                    |
| Tc42             | Wild-type         | <i>RPB42::Ty1</i><br><i>NEO</i> | G418                  | Ty1-tagged RBP42 parasites for protein localization studies      |
| TcGFP            | Wild-type         | <i>GFP::NEO</i>                 | G418                  | Positive control for transfections and Immunofluorescence assays |
